# Supplementary material for: Effect of continuous planting on Casuarina equisetifolia rhizosphere soil physicochemical indexes, microbial functional diversity and metabolites
Source: Front Plant Sci. 2023 Dec 14;14:1288444. doi: 10.3389/fpls.2023.1288444 (PMC10752937; doi:10.3389/fpls.2023.1288444)
Supplement: Supplementary Table 1 — Metabolites in rhizosphere soil of Casuarina equisetifolia with different numbers of continuous planting. [file Table_1.xlsx]

## Sheet: Soil metabolites data
Index	Molecular weight (Da)	Formula	RI	NIST_RI	Compounds	Class I	CAS	Metabolite content of M1 rhizosphere soil			Metabolite content of M2 rhizosphere soil			Metabolite content of M3 rhizosphere soil
								Repeat 1	Repeat 2	Repeat 3	Repeat 1	Repeat 2	Repeat 3	Repeat 1	Repeat 2	Repeat 3
TMS_IS_08	157.11	13C5H12O5	1707.33	1700	Ribitol-13C5	Carbohydrate	CMS-N0382	35195.2	35070.5	37260.4	38998.7	40363.7	41979.3	37612.7	40828.8	42675.2
S_TMSMW0265	108.058	C7H8O	1153.69	1291	Benzyl Alcohol 2	Alcohol	100-51-6	2023.05	4172.13	2289.38	1867.5	5479.61	5072.24	5383.37	2540.93	5711.12
S_TMSMW0495	330.277	C19H38O4	2541.56	2558	Hexadecanoic acid, 2-hydroxy-1-(hydroxymethyl)ethyl Ester	Ester	23470-00-0	22177.4	21390.8	20554.4	18237.5	16417.4	9988.07	18522.6	18010.8	17193.2
S_TMSMW1424	141.127	C7H15N3	1657.63	-	4-azido-Heptane	Nitrogen compounds	27126-22-3	9906.35	8585.49	9059.8	12167.5	10727	10254.2	10418	11016.3	11782.4
S_TMSMW1346	168.188	C12H24	1309.42	1319.0000	butyl-Cyclooctane	Hydrocarbons	16538-93-5	3898	4526	4670	4907	4727	4758	5396	5447	5536
S_TMSMW0624	170.203	C12H26	1113.02	958	2,3,6,7-tetramethyl-Octane	Lipid	52670-34-5	10982.6	12676.5	12638.4	14998.9	14846	12534.6	13376.4	15483.4	15327.7
S_TMSMW0423	154.03	C4H10O4S	1329.15	1494	2,2'-sulfonylbis-Ethanol	Alcohol	2580-77-0	3492.34	3702.62	3605.34	4854.67	4611.22	3695.89	6467.52	7456.04	6008.16
S_TMSMW0431	106.063	C4H10O3	1332.66	1233	2,2'-oxybis-Ethanol	Alcohol	111-46-6	9495.28	8273.98	10820.3	10480.3	12055.2	12607.8	21906.4	18167.9	15386.4
S_TMSMW0875	134.094	C6H14O3	1332.7	1159.0000	2-(2-ethoxyethoxy)-Ethanol	Alcohol	111-90-0	9738.98	8273.98	11222.4	10399.4	10341.1	12271.7	22116.5	16959.3	16226.9
S_TMSMW0693	184.219	C13H28	1339.65	1185	4,8-dimethyl-Undecane	Lipid	17301-33-6	23811	21150.3	21237.1	24965.2	26389.3	23954	27313.6	27874.5	26671.5
S_TMSMW0167	158.131	C9H18O2	1356.21	1355	Nonanoic Acid	Acid	112-05-0	6918.6	4644.19	6689.55	4725.76	6583.93	5536.29	5454.45	6869.54	7273.15
S_TMSMW0355	198.235	C14H30	1400.11	1400	Tetradecane	Lipid	629-59-4	60529.5	64603.4	60682.5	60537.9	65742.3	59895.2	66566.8	69823	72513.6
S_TMSMW0613	184.219	C13H28	1410.83	1185	6-ethyl-2-methyl-Decane	Lipid	62108-21-8	43448.4	40228.6	42378.4	49504.6	53268	55742.8	53175.1	54920	58861.1
S_TMSMW1094	212.25	C15H32	1274.47	1275.0000	2,6,11-trimethyl-Dodecane	Lipid	31295-56-4	95222.9	94164.7	97905.8	105307	116253	115264	116195	122997	125210
S_TMSMW0726	184.219	C13H28	1415.69	1190	5,7-dimethyl-Undecane	Lipid	17312-83-3	20451.2	19163.5	21512.8	19825.2	25503.4	24404.6	24371.1	26951.7	25575.8
S_TMSMW0430	60.032	CH4N2O	1231.99	1249	Urea	Nitrogen compounds	57-13-6	6656.1	3052.77	6089.7	5195.57	7446.84	7567.05	9975.52	5654.34	6682.86
S_TMSMW0621	203.131	C13H17NO	1464.53	1771	4-ethyl-N-methallyl-Benzamide	Others	1000340-34-6	4348.51	4051.14	4640.54	4929.93	5451.68	4792.37	5424.2	4957.25	5550.85
S_TMSMW1298	164.02	C5H3F3N2O	1035.5	913.0000	4-Hydroxy-6-(trifluoromethyl)pyrimidine	Heterocyclic compound	1546-78-7	15906	16158.2	16405	19141.5	19159.6	20315.4	21478.7	20883.1	22106.9
S_TMSMW0443	170.203	C12H26	1164.07	1164	2-methyl-Undecane	Lipid	7045-71-8	10799.7	11435.3	11339.9	13355.3	12960.5	13305.3	12791.8	14293.7	15040.5
S_TMSMW0161	92.047	C3H8O3	1260.91	1289	Glycerin	Alcohol	56-81-5	1.0327e+06	4.94595e+06	972269	1.20239e+06	1.23114e+06	1.21507e+06	1.18659e+06	1.18472e+06	1.17773e+06
S_TMSMW1370	134.11	C10H14	1162.25	1022.0000	o-Cymene	Aromatics	527-84-4	5019.09	4631.65	5045.29	5055.73	5291.52	4865.33	5449.31	6125.92	5535.25
S_TMSMW0774	94.042	C6H6O	904.654	1053	Phenol	Aromatics	108-95-2	6531.31	6556.79	6364.55	7063.86	6407.76	6059.98	5656.74	6663.44	7248.84
S_TMSMW0258	61.02	CH3NO2	1017.63	962	carbamic Acid 1	Acid	463-77-4	70126.1	68060.7	75389.8	80497.9	85231.7	87540.3	97288.6	94965.6	95707.8
S_TMSMW0291	89.995	C2H2O4	1122.51	1136	Oxalic Acid	Acid	144-62-7	24205.5	24683.2	24650	24840.7	25650.1	26978.8	30015.5	29879.7	30065.1
S_TMSMW0963	156.188	C11H24	1023.66	1018.0000	2,6-dimethyl-Nonane	Lipid	17302-28-2	45175.1	39281.6	43894.5	46398.3	46396	47510.2	47077.6	47894.6	48296.7
S_TMSMW1555	172.146	C10H20O2	1010.97	1171.0000	2-Ethylhexanal ethylene glycol acetal	Aldehyde	1000431-01-2	31422.6	38793.3	42368.7	45435.3	52065.9	47553.5	61292	74353.4	61687.9
S_TMSMW0234	358.308	C21H42O4	2767.89	2806	Octadecanoic acid, 2,3-dihydroxypropyl Ester	Ester	123-94-4	825727	910502	982335	1.00466e+06	967137	443921	1.02204e+06	1.22412e+06	1.15456e+06
S_TMSMW0973	170.203	C12H26	1252.34	1156.0000	5-methyl-Undecane	Lipid	1632-70-8	36788.7	36473.9	38580.2	40943	48373.3	46264.6	48229.5	48699.8	51182.8
S_TMSMW1103	184.219	C13H28	1240.22	1222.0000	3,7-dimethyl-Undecane	Lipid	17301-29-0	16765.4	16592.1	17095.5	17516.2	19042.3	19765.6	20118.2	21376.6	25516.5
S_TMSMW0171	244.167	C13H24O4	1288.9	1499	Oxalic acid isohexyl neopentyl ester	Lipid	1000309-73-0	16561.4	17022.7	18847	19754.1	22316.7	22950.7	21389	24795.2	23725.5
S_TMSMW1061	140.157	C10H20	1077.85	989.0000	1-Decene	Hydrocarbons	872-05-9	22797.5	24739.7	22618.7	24815.3	19705	26451.4	18047	17954.9	21172
S_TMSMW1287	104.148	C5H12O2	939.948	1022.0000	2-Methyl-1,4-Butanediol	Alcohol	2938-98-9	3.92392e+07	3.91852e+07	3.94112e+07	4.04424e+07	4.05007e+07	4.01042e+07	4.07655e+07	4.03033e+07	4.05938e+07
S_TMSMW0977	184.219	C13H28	978.046	1121.0000	2,5,9-trimethyl-Decane	Lipid	62108-22-9	28301.9	25575.8	27024	32024.2	28406.9	31790.5	36287.2	35560.2	37728
S_TMSMW0220	483.405	C30H52F3N	2395.25	2977	3-Trifluoromethylbenzylamine, N,N-diundecyl	Others	1000310-29-9	13154.9	14516.2	15108.1	15287.2	19122.1	15715.5	16756.1	15598.3	19062.3
S_TMSMW0527	90.032	C3H6O3	1638.37	1752	(S)-2,3-dihydroxy-Propanal	Hydrocarbons	497-09-6	6433.21	6635.49	6103.07	6264.39	6640.47	6220.9	5324.38	5070.76	5494.67
S_TMSMW0261	61.02	CH3NO2	1057	1140	carbamic Acid 2	Acid	463-77-4	45873	43300	49512	49435	50946	52739	55961	54337	56565
S_TMSMW0210	180.063	C6H12O6	1940.43	2194	Inositol	Alcohol	6917-35-7	5232.14	5172.71	6434.31	6306.84	6155.31	6170.46	8235.83	8130.05	7012.91
S_TMSMW0284	152.068	C5H12O5	1701.82	1746	D-Arabinitol 2	Carbohydrate	488-82-4	31485.4	29275.4	30583.1	25659.9	21271.3	25071.3	18377.4	18311.6	19449.1
S_TMSMW1069	170.058	C8H10O4	1077.85	1131.0000	Ethylene diacrylate	Ester	2274-11-5	22645.5	24739.7	22618.7	24996.5	20649.8	28383	17844	17529.1	21246.4
S_TMSMW0844	184.219	C13H28	1212.24	1210	2,6-dimethyl-Undecane	Lipid	17301-23-4	40936.9	40427.3	41213.8	44679	52120	52903.7	53165.9	51499.7	56540.1
S_TMSMW1408	113.059	C4H7N3O	958.056	1112.0000	5-Ethyl-1,2,4-oxadiazol-3-amine	Amine	171006-96-5	40968.5	39471.1	43187.2	45798.8	45782.7	45600.2	48869.7	49655.5	49256.6
S_TMSMW0845	264.176	C13H28O3S	1522.59	1873	Sulfurous acid, decyl 2-propyl ester	Lipid	1000309-12-1	5927	5994	5832	7312	7275	8012	7480	8898	8107
S_TMSMW0230	342.116	C12H22O11	2613.4	2712	Sucrose	Carbohydrate	57-50-1	115339	73878.8	82147	86581.9	44731.6	89972.8	16566.8	20232.4	31465.8
S_TMSMW0296	164.084	C10H12O2	1527.05	1417	4-(1-methylethyl)-Benzoic Acid	Acid	536-66-3	4463.23	5153.41	4074.82	3624.75	3609.44	3970.91	4264.23	4137.72	4031.24
S_TMSMW0130	90.068	C4H10O2	1033.71	1032	2,3-Butanediol	Alcohol	513-85-9	204619	186427	189505	215312	192897	188612	147241	157096	155272
S_TMSMW1087	154.172	C11H22	1081.7	1056.0000	8-methyl-1-Decene	Hydrocarbons	61142-79-8	3777.16	3634.71	4109.83	4742.29	4550.03	3849.84	4511.86	5726.18	4489.72
S_TMSMW0030	170.203	C12H26	1199.88	1200	Dodecane	Lipid	112-40-3	113871	114954	119084	125611	138427	127746	133563	143879	148796
S_TMSMW0334	59.073	C3H9N	1126.1	1055	PropylAmine	Amine	107-10-8	46927.8	45558.3	49337	51292.8	51521.3	51118.4	55465.5	57008.3	59496.6
S_TMSMW0666	142.172	C10H22	1002.53	1000	Decane	Lipid	124-18-5	25941.8	28972.5	27827.1	31298.9	31297.5	31809.2	34151.6	35572	35069.3
S_TMSMW1308	282.256	C18H34O2	2213.11	2232.0000	cis-13-Octadecenoic acid	Acid	13126-39-1	5260.3	4894.05	5574.35	3990.69	5457.14	2372.9	5820.41	4711.88	5710.84
S_TMSMW0718	206.167	C14H22O	1510.1	1519	2,4-Di-tert-butylPhenol 1	Phenol	96-76-4	43103	45732.8	48558.2	49135.5	50196.7	49421.4	49751.7	52478.6	53557.5
S_TMSMW0144	76.027	CH4N2O2	1132.7	1265	Hydroxyurea	Nitrogen compounds	127-07-1	2.02981e+06	2.48018e+06	2.47745e+06	2.81445e+06	3.30086e+06	2.61286e+06	4.11013e+06	4.38189e+06	4.1387e+06
S_TMSMW0897	180.063	C6H12O6	1900.37	1931.0000	d-Mannose 1	Carbohydrate	3458-28-4	29225.5	34838.6	36101.5	25020.1	26648.9	23121.8	15365.4	15967.5	17923.9
S_TMSMW0571	150.05	C5H10O5	1645.23	1897	2,3,4-Trihydroxy-3-(Hydroxymethyl)Butanal	Aldehyde	639-97-4	9926.07	16543.1	16144.5	13665.1	12950.2	11115.6	8910.8	9678.97	10591.6
S_TMSMW0162	184.219	C13H28	1099.89	1185	4,7-dimethyl-Undecane	Lipid	17301-32-5	55553.5	56520.1	59582.7	62457.1	69387.6	66270.9	69061.1	70827.9	74539.3
S_TMSMW0126	85.039	CH3N5	1666.46	-	1H-Tetrazol-5-Amine	Amine	4418-61-5	3347.94	4686.86	4165.1	4593.28	4446.91	4535.54	4052.1	5456.35	5248.11
S_TMSMW1000	184.219	C13H28	1014.71	1223.0000	5,6-dimethyl-Undecane	Lipid	17615-91-7	21754.9	21848.1	23392.6	24372	23639.4	22764.9	26561.7	27569.1	27187.2
S_TMSMW0350	240.282	C17H36	1744.24	1700	Heptadecane	Lipid	629-78-7	35268.5	37021.1	36189.7	42846.6	41686.7	40226.4	41168.4	47581	45258.8
S_TMSMW0544	192.094	C15H12	1182.55	-	1,1'-(1,2-propadienylidene)bis-Benzene	Aromatics	14251-57-1	8031.33	6629.46	7349.9	7727.34	9159.78	7700.69	8808.29	8684.04	9604.61
S_TMSMW0176	206.167	C14H22O	1537.7	1549	2,4-Di-tert-butylPhenol 2	Phenol	96-76-4	96406.2	91688.9	92451.2	106502	149377	121178	109564	127251	137304
S_TMSMW0028	110.013	C3H7ClO2	1179.75	1049	3-chloro-1,2-Propanediol	Alcohol	96-24-2	5359.14	6766.04	6632.31	7132.96	7352.63	7082.63	7022.37	7004.05	8857
S_TMSMW0609	142.172	C10H22	968.459	964	2-methyl-Nonane	Lipid	871-83-0	8018.75	9271.08	7502.24	9489.3	11144	11136.4	11090.9	11220.5	9654.32
S_TMSMW0852	184.219	C13H28	1221.33	1220	2,8-dimethyl-Undecane	Lipid	17301-25-6	22886.8	22989.6	20560.5	23690.6	27074.6	28592.3	29105.8	28174.9	27346
S_TMSMW0157	122.037	C7H6O2	1248.83	1249	Benzoic Acid 1	Acid	65-85-0	3021.86	5543.19	5272.43	5622.22	5681.28	4802.69	5969.62	6399.12	5805.53
S_TMSMW1289	141.128	C5H7N3O2	1633.55	1659.0000	Methyl 5-aminopyrazole-4-carboxylate	Ester	29097-00-5	3112	4304	4636	3062	3471	3551	3362	3353	3217
S_TMSMW0785	180.063	C6H12O6	1853.7	1869	Fructose 1	Carbohydrate	57-48-7	105392	137729	138990	51954.1	60700.2	43649.7	26869.8	28328	30979.7
S_TMSMW0225	330.277	C19H38O4	2576.05	2607	Glycerol 1-palmitate	Ester	542-44-9	1.79665e+06	1.88361e+06	1.99754e+06	1.95012e+06	1.88384e+06	900269	1.95038e+06	2.29745e+06	2.17447e+06
S_TMSMW0804	302.25	C17H34O4	2383.68	2338	2,3-dihydroxypropyl 12-methyltridecanoate	Lipid	10828227	19353.8	19915.1	21099.2	20321.9	18238.4	8246.07	19528.8	23107.5	21518.9
S_TMSMW0142	170.203	C12H26	1055.64	1106	2,4-dimethyl-Decane	Lipid	2801-84-5	106725	104604	111740	120405	122772	122581	132245	134482	134954
S_TMSMW0493	182.079	C6H14O6	1912.93	1964	D-Mannitol 2	Carbohydrate	69-65-8	216402	207626	221377	233908	224119	256019	421156	420245	445257
S_TMSMW0016	62.037	C2H6O2	980.165	990	1,2-Ethanediol	Alcohol	107-21-1	65772.3	64017.9	65562.9	72234.7	75798.4	71557.7	58544.9	62963	62378.9
S_TMSMW0211	256.24	C16H32O2	2041.74	2050	n-Hexadecanoic Acid	Acid	57-10-3	495299	454160	502542	587260	577529	568017	638928	655010	671676
S_TMSMW0199	228.209	C14H28O2	1845.13	1850	Tetradecanoic Acid	Acid	544-63-8	3250.9	3310.72	3903.63	4580.89	4270.13	4649.69	4176.29	5128.34	4264.1
S_TMSMW0790	426.17	C17H30O12	2723.61	2853	4-(2-Methylbutanoyl)Sucrose	Carbohydrate	122706131	2.62657e+06	2.5862e+06	2.67414e+06	2.11788e+06	1.9035e+06	2.14559e+06	1.31316e+06	1.30816e+06	1.44937e+06
S_TMSMW0916	180.063	C6H12O6	1879.87	1939.0000	D-Galactose 3	Carbohydrate	59-23-4	162753	215108	205507	152036	160185	141804	87867.8	92155.3	94514.5
S_TMSMW0960	352.163	C16H33I	1954.39	2038.0000	1-iodo-Hexadecane	Others	544-77-4	23453.5	23972.2	24756.1	22623.4	23723	24612.2	28293.3	28976	31172.2
S_TMSMW0133	142.059	C8H8F2	911.013	843	1-Ethyl-2,6-difluorobenzene	Amine	83484-01-9	8170.8	8322.13	8079.75	9409.89	10136	9507.69	10711.9	10583.4	10375.5
S_TMSMW0115	59.037	C2H5NO	914.529	828	Acetamide 1	Amine	60-35-5	52226.6	50033.3	52016.5	56898.7	64371.6	61620.7	67141.9	67039.1	68593.7
S_TMSMW1091	263.261	C18H33N	2087.81	2084.0000	(Z)-9-Octadecenenitrile	Nitrogen compounds	112-91-4	81243.5	67149.6	60161.1	50233.6	51018.3	25769.4	55569.3	27757	57621.5
S_TMSMW0762	281.272	C18H35NO	2369.52	2386	(Z)-9-Octadecenamide 1	Amine	301-02-0	4.47705e+06	3.94054e+06	3.57606e+06	2.95923e+06	3.09243e+06	928278	2.82775e+06	852172	3.98606e+06
S_TMSMW0920	116.12	C7H16O	914.054	975.0000	2,4-dimethyl-3-Pentanol	Alcohol	600-36-2	45982.7	41338	46173.7	48097.5	47182.3	43403.5	55278.3	60493.8	57573.1
S_TMSMW0219	284.272	C18H36O2	2238.4	2246	Octadecanoic Acid	Acid	57-11-4	336691	307469	331412	378322	372230	349638	408607	405187	434557
S_TMSMW1406	283.288	C18H37NO	2391.99	2374.0000	Octadecanamide 1	Amine	124-26-5	436598	379254	318430	296994	301096	114177	233228	97528.7	328470
S_TMSMW0124	76.052	C3H8O2	993.299	1007	Propylene Glycol	Alcohol	57-55-6	681999	593008	609400	660489	629314	606902	447343	482154	474230
S_TMSMW1394	385.319	C22H43NO4	2676.66	2528.0000	Alanine, N-methyl-N-ethoxycarbonyl-, pentadecyl ester	Amino acid	1000329-29-1	8446.39	7620.48	6936.68	4947.64	4361.91	3614.06	4620.88	4943.8	4396.49
S_TMSMW0902	180.063	C6H12O6	2077.37	2194.0000	Muco-Inositol	Alcohol	488-55-1	19994.1	20291.8	19706.7	18903.6	17448	19910.2	20138.6	20987.4	21103.5
S_TMSMW0091	362.391	C26H50	2613.72	3039	Cyclotetracosene, 1,2-dimethyl-	Lipid	1000164-72-7	28095.5	18493.9	20942	21077.1	12101.7	22757	4667.79	5011.67	7414.82
S_TMSMW0134	90.032	C3H6O3	1051.04	1066	Lactic Acid	Acid	50-21-5	891599	843107	874420	945471	1023102	991791	1064896	1143551	1125253
S_TMSMW0151	104.011	C3H4O4	1194.96	1216	Propanedioic Acid 2	Acid	141-82-2	1.52196e+06	1.45717e+06	1.49911e+06	1.37487e+06	1.62293e+06	1.32108e+06	1.42281e+06	1.8875e+06	1.44224e+06
S_TMSMW0140	130.136	C8H18O	1098.23	1036	2-ethyl-1-Hexanol	Alcohol	104-76-7	6498.54	8628.89	8247.5	8289.4	5432.6	5619.7	6045.25	7347.1	8211.56
